# Supplementary material
Source: PubMed Central journal article supplement (PMC7907415)
Supplement: 12298_2021_947_MOESM1_ESM.pdf [file 12298_2021_947_MOESM1_ESM.pdf]

```

          *           20           *           40
TEA033470. : -----MRF C I I V L F S I I : 12
TEA033474. : -----MRF C I I V L F S I I : 12
TEA019397. : -----MRF W I I V L F S I L : 12
TEA020688. : -----MK M R S W A L T M L C L L : 14
TEA021819. : -----M W D V G F F K L F : 10
TEA031377. : -----MK M R S W A L T I L C L L : 14
TEA032945. : ----- : -
TEA019594. : ---M L Y L E I V I R V G V H G Q Q S L N F Q L F G R K G S F Y Y S A F Y Y A : 37
TEA020672. : ----- : -
TEA027403. : M E S R L G L Y F A V L D S S N R G L P P A A D Q S A S Q V P G Y G V I T N I I Y : 41

```

```

          *           60           *           80
TEA033470. : S L ----- L G ----- : 16
TEA033474. : S L ----- L G ----- : 16
TEA019397. : S F S L V A L -- A Q Q C D S Q A G G K L C V G G L C C S Q Y G Y C G N T S P Y C : 51
TEA020688. : A A L L I T I G S A E Q C G S Q A E G A L C A G G L C C S E Y G W C G T T Y D Y C : 55
TEA021819. : Q K E Y K N ----- S L E A Y ----- : 21
TEA031377. : A A L L I T K G S A E Q C G R Q A E G A L C P G G L C C S E Y G W C G T T Y D Y C : 55
TEA032945. : ----- : -
TEA019594. : M S S Y C N P P P V L D L A V G C D H K S C L R W I S S S S S S S G R T L G Q T V : 78
TEA020672. : ----- : -
TEA027403. : G N L E C S H G T D S R V E S R S G F Y Q R L R R V A I P N S Q A L S L L G R D L : 82

```

```

          *           100          *           120
TEA033470. : -----A T A Q D I S S L : 25
TEA033474. : -----A T A Q D I S S L : 25
TEA019397. : S T G C Q S Q C S P G G G S P S T P S T ----- P T P T P S G G D I S S I : 85
TEA020688. : G L G C Q S Q C S I T P P P P P ----- S P P S G G D I T N L : 82
TEA021819. : -----A A A N L G I V E P L : 32
TEA031377. : G P G C Q S Q C S I T P P P P P P P P P T T P P P P P P S P P G E N I T N L : 96
TEA032945. : ----- : -
TEA019594. : L L H V G A N L S N V T S A G R H T Q M E S V R S Y I L A C G F L I G R T L A V L : 119
TEA020672. : ----- : -
TEA027403. : R E A H L Q V L L G G S G Y R S S N A N S S N A V T D P F L S S L I L N F P S S K : 123

```

```

          *           140           *           160
TEA033470. : ISRD LFDQMLKHRNDASCPGNGFYTYDAFVAAAKSFGGFGT : 66
TEA033474. : ISRD LFNQMLKHRNDASCPGNGFYTYDAFVAAAKSFGGFGT : 66
TEA019397. : ISRTLFHQMLKHRNDANCPGKGFYTYDAFIAAKAFGGFGT : 126
TEA020688. : ITSTMFDLMFPNRNYSTCNGEDFYTYDAFITAAESFPAFAT : 123
TEA021819. : LPTATQTKAAKARMTLLVLPAS-TPMTLSHIVDLNSNFDT : 72
TEA031377. : ITRSMFDQMF PNRNYSRCNSED FYTYDAFITAAKSFPAFAT : 137
TEA032945. : -----MLPNRNYSGRSEDFYTYDAFITAAKSFPPTFAT : 33
TEA019594. : VTMTRGTSMAARQGTALIASYSKGDYRTSREVANFALKVS : 160
TEA020672. : -----MSHVAEVI MALLRCFAVMSK : 20
TEA027403. : SKDILKSVLSSADSSVKSVTSSHIWKASFDPSLSYEEREK : 164

```

```

          *           180           *           200
TEA033470. : TGD TDTRKREIAAFLAQTSHETT----- : 89
TEA033474. : TGD TNTRKREIAAFLAQTSHETT----- : 89
TEA019397. : TGD TVTRKREIAAFLGQTSHETT----- : 149
TEA020688. : TGD TDCERELAAFFGQTSQQT----- : 146
TEA021819. : TGD TATQOREIAAFLAQTSHETT----- : 95
TEA031377. : TSD TDTCKRELAFFGQTSQETS----- : 160
TEA032945. : TGD TDTCKRELAFFGQTSHETTEQRGGEEEREKGGGPD : 74
TEA019594. : HSYRIAHKVS LAAIILGLSFGSLATLFTKDAEVLGVVRTGVL : 201
TEA020672. : SR----- : 22
TEA027403. : RKRQAERA EAIKCMHHSKRTMLT----- : 188

```

e aa

```

          *           220           *           240
TEA033470. : ----- : -
TEA033474. : ----- : -
TEA019397. : ----- : -
TEA020688. : ----- : -
TEA021819. : ----- : -
TEA031377. : ----- : -
TEA032945. : RGGEGKKR----- : 82
TEA019594. : FVSASQPVNALAFIFYGLHYGVSDFPYAACSMVVGAICSS : 242
TEA020672. : ----- : -
TEA027403. : ----- : -

```

```

      *           260           *           280
TEA033470. : -----GGWPSAPDGPYAWGYCHVREQNPAGD : 115
TEA033474. : -----GGWPSAPDGPYAWGYCHVREQNPAGD : 115
TEA019397. : -----GGWPTAPDGPYAWGYCFVKEQGNPGD : 175
TEA020688. : -----GGWDAAPGGRFLWGYCFIKELNPPSD : 172
TEA021819. : -----GGWATAPDGPYAWGYCFLREQGNPPD : 121
TEA031377. : -----GGWETAPGGRYMWGYCFIKELNPPSD : 186
TEA032945. : -----ERKGRGGGPDSPKTRRRRSFDRRLALPPPSQ : 113
TEA019594. : FLLYVPSIFGLHGVAAGLALFMGLRTLAGEYIRISSKNGPWW : 283
TEA020672. : -----GGWDVAPSGRFLWGYCRVKEVLS--- : 45
TEA027403. : -----TDDVDNALNLRNVELIYGFASGHPLRFRRRT : 218
                gg      p      g5

```

```

      *           300           *           320
TEA033470. : YCSPSQ-----EWPCAPGKQYYGRG : 135
TEA033474. : YCSPSQ-----EWPCAPGKQYYGRG : 135
TEA019397. : YCVASQ-----QWPCAPGKKYYGRG : 195
TEA020688. : YCDQGSQ-----TQWPCAPGKQYYGRG : 194
TEA021819. : YCVQDA-----QWPCAPGKQYYGRG : 141
TEA031377. : YCDQGSQ-----TQWPCAPGKQYYGRG : 208
TEA032945. : VVQPSDRR--LASASGLPPPPLPPVIMAPSSPAHRRLPSP : 152
TEA019594. : FLHQDLKGSEVYQFGNESLLPLRVPSHVLAELIAPYMKGT : 324
TEA020672. : ----- : -
TEA027403. : AGHKDLFY-----IDDKDLDFKDVIEVP : 241

```

```

      *           340           *           360
TEA033470. : P----IQIS----HNYNYGPAGKAIGS----- : 154
TEA033474. : P----IQIS----HNYNYGPAGKAIGS----- : 154
TEA019397. : P----IQIS----YNYNYGQAGKAIGY----- : 214
TEA020688. : P----IQLS----YNYNYGQAGEALGL----- : 213
TEA021819. : P----IQIS----YNYNYGPAGSAIGV----- : 160
TEA031377. : P----IQLS----YNYNYGQAGEALGL----- : 227
TEA032945. : PLSLLPIPSTPLCNINYGQAGVALGLGL----- : 181
TEA019594. : NARCPVVLSECRFMLYLSHSNTSFSVSLMLGSLNVPSKSSAS : 365
TEA020672. : -----IGEALGL----- : 52
TEA027403. : LPKAPLYTSIVCHWLAIEGAQPASPENAP----- : 270
                s           g   g   a

```

```

*           380           *           400           *
TEA033470. : -----DLIGNPDLVATDPTISFKTAFWFWMT : 180
TEA033474. : -----DLIGNPDLVANNPTISFKTALWFWMT : 180
TEA019397. : -----DLINNPDAVATDPTTSFKTALWFWMT : 240
TEA020688. : -----DLLNNPDLVETDPVISFQTALWFWMT : 239
TEA021819. : -----DLLNNPDLVATDPVISFKTAIWFWMT : 186
TEA031377. : -----DLLNNPDLVETDPVISYQTALWFWMT : 253
TEA032945. : -----ELLNNPDLVETDPTISFKTALWFWMA : 207
TEA019594. : HRHLISEVYREALGLDLLNNPDLVQTDVPVISFRIALWFWMT : 406
TEA020672. : -----DVLNNPDLAETDPVISFETA V WFWMT : 78
TEA027403. : -----VEEPIKRVLI FEMIVQLAYRTALCKSKR : 298
          d 6 npd v t p   s5 tA wfwmt

```

```

          420           *           440           *
TEA033470. : P-----QSPKPSCHDVITGSWTPSSADTSAGRVPGY : 211
TEA033474. : P-----QSPKPSCHAVITGRWTPSSADTSAGRVPGY : 211
TEA019397. : P-----QSPKPSCHSVITGQWTPSSADRAAGRLPGY : 271
TEA020688. : P-----QYPKPSCHDVIIIGNWTPTSADQLAGRVPGY : 270
TEA021819. : P-----QSPKPSCHDVIDGSWTPSAADQSAGRFPGY : 217
TEA031377. : P-----QYPKPSCHDVIIIGNWTPTSADQLAGRVPGY : 284
TEA032945. : T-----QSPKPSCHDVIIIGNLTPTPADQLAGRVPGY : 238
TEA019594. : S-----QSPKPSCHAVITETWTSSAAGQSESRVPEY : 437
TEA020672. : T-----QSPKPSCHDVIIIGNWTPMPDDLAA SRVPWS : 109
TEA027403. : EGFKDTPDDL LAPVLRCPETVPIRTMNRQCSSGLQAVADV : 339
          q PkpsCh v6 g wtp ad a r p y

```

```

          460           *           480           *
TEA033470. : GVITNIINGGLECGKGSNAQAEDRIGFYKRYC--D LFGVGY : 250
TEA033474. : GVITNIINGGLECGKGSNAKAEDRIGFYKRYC--D LFGVGY : 250
TEA019397. : GVITNIINGGLECGKGSVSQQEDRIGFYKRYC--D I FGVGY : 310
TEA020688. : GVITNIINGGLECGHGQDSRVKYRIGFYQRYCSDEIFDVST : 311
TEA021819. : GVITNIINGGLECGHGSDARVQDRIGFYQRYC--Q IIGVSP : 256
TEA031377. : GVITNIINGGLECGHGEDSIVKYRIGFYQRYCSDEIFDVST : 325
TEA032945. : GVITNIINGGLQCGRGPDSRVEDRIGFYQRYCSDEIFDVST : 279
TEA019594. : GVITNI IYGNLECSNGMDSRVESRIGFYQRYCSDEIFGVST : 478
TEA020672. : LSEP DSYLTLCN CNYPTVVAISSKLHNL LLY----- : 140
TEA027403. : AA AIKAGFYD IGI GAGLESMTANPMAWEGSVNPRVK TMAQH : 380
          gv it ii g   cg g           6g y ry           v

```

|            |                                              |       |     |     |  |
|------------|----------------------------------------------|-------|-----|-----|--|
|            | 500                                          | *     | 520 | *   |  |
| TEA033470. | : GNNLDCNNQPFA                               | ----- | :   | 263 |  |
| TEA033474. | : GNNLDCNNQRPFA                              | ----- | :   | 263 |  |
| TEA019397. | : GSNLDCNNQRPFA                              | ----- | :   | 323 |  |
| TEA020688. | : GDNLDCYNQSPFGTGLLLDSIHKIVASLNEETNNTTNDFEK  | ----- | :   | 352 |  |
| TEA021819. | : GDNLDCGNQVPFSGSGLLVDTM                     | ----- | :   | 277 |  |
| TEA031377. | : GDNLDCYNQSPFGTGLLLDSM                      | ----- | :   | 346 |  |
| TEA032945. | : GDNLDCNNQAPFSGTGLLLDSM                     | ----- | :   | 300 |  |
| TEA019594. | : GDNLDCNNQRPFGFGLLFDSM                      | ----- | :   | 499 |  |
| TEA020672. | :                                            | ----- | :   | -   |  |
| TEA027403. | : QDCILPTGVTSIGFQTSEDIYRFYAISTGFSEFSNKDKTLN- | ----- | :   | 420 |  |
|            | g nldc nq pf                                 |       |     |     |  |

|            |                                            |       |     |     |  |
|------------|--------------------------------------------|-------|-----|-----|--|
|            | 540                                        | *     | 560 | *   |  |
| TEA033470. | :                                          | ----- | :   | -   |  |
| TEA033474. | :                                          | ----- | :   | -   |  |
| TEA019397. | :                                          | ----- | :   | -   |  |
| TEA020688. | : FDCVLQSLIGHKKSTSNANLQNQLAKMELSIEDLEELEYL | ----- | :   | 393 |  |
| TEA021819. | :                                          | ----- | :   | -   |  |
| TEA031377. | :                                          | ----- | :   | -   |  |
| TEA032945. | :                                          | ----- | :   | -   |  |
| TEA019594. | :                                          | ----- | :   | -   |  |
| TEA020672. | :                                          | ----- | :   | -   |  |
| TEA027403. | :                                          | ----- | :   | -   |  |

|            |                     |       |       |
|------------|---------------------|-------|-------|
|            | 580                 | *     |       |
| TEA033470. | :                   | ----- | :     |
| TEA033474. | :                   | ----- | :     |
| TEA019397. | :                   | ----- | :     |
| TEA020688. | : FRRLIKIRVSLLNILNH | ----- | : 410 |
| TEA021819. | :                   | ----- | :     |
| TEA031377. | :                   | ----- | :     |
| TEA032945. | :                   | ----- | :     |
| TEA019594. | :                   | ----- | :     |
| TEA020672. | :                   | ----- | :     |
| TEA027403. | :                   | ----- | :     |

TEA003375. : MDSKWWVLAMTLVLA**MAIECIADGDSSVPI**LT**KT**TVKGKKVC : 41  
 TEA022978. : MDSKWWVLAMTLVLA**MAIECIADGDSSVPI**LT**KT**TVKGKKVC : 41  
 TEA031227. : **ME**TKWWVLAMAVAVT**MAIMGIADGDSSTPTVVKI**TVKGKKVC : 41  
 Md3KWWVLAMt6v6aMAIecIADGDSSvPi6tKtVKGKKVC

TEA003375. : **SQGWECQGW**SKYCC**NOTISNFFQTYQFENLFSKR**NPVAHA : 82  
 TEA022978. : **SQGWECQGW**SKYCC**NOTISNFFQTYQFENLFSKR**NPVAHA : 82  
 TEA031227. : **DKGWEC**KGLSKYCC**NDTISDYFQTYQFENLFSKR**NPVAHA : 82  
 sqGWECqGwSKYCCNqTIS15FQTYQFENLFSKRNaPVAHA

TEA003375. : **VGFWDYKSFITAAAVYQPI**L**GF**GTTGGK**QMG**LEVA**AF**LGHV : 123  
 TEA022978. : **VGFWDYKSFITAAAVYQPI**L**GF**GTTGGK**QMG**LEVA**AF**LGHV : 123  
 TEA031227. : **VGFWDYKSFITAAAEYQPH**L**GF**GTTGGK**LTM**KEVA**AF**LGHV : 123  
 VGFWDYKSFITAAAvYQPIlGFgTTGGKqmGmLEVA**AF**LGHV

TEA003375. : **GSKTSCGYGVATGGPMAWGLCYNKELSPS**QSYCDD**FYKFTY** : 164  
 TEA022978. : **GSKTSCGYGVATGGPMAWGLCYNKELSPS**QSYCDD**FYKFTY** : 164  
 TEA031227. : **GSKTSCGYGVATGGPLAWGLCYNKEMSPS**QSYCDD**SFKYTY** : 164  
 GSKTSCGYGVATGGP6AWGLCYNKE6SPS**QSYCDDf5K5TY**

TEA003375. : **PCTPGA**EYYGRGAIPIY**WNNNYGATGEAL**NVDLL**NHPEYIE** : 205  
 TEA022978. : **PCTPGA**EYYGRGAIPIY**WNNNYGATGEAL**NVDLL**NHPEYIE** : 205  
 TEA031227. : **PCTPG**VEYYGRGAIPIY**WNNYNYGATGEAL**KVDLL**SHPEYVE** : 205  
 PCTPGaEYYGRGAIPIYWNnNYGATGEALnVDLLn**HPEY6E**

TEA003375. : **QNATLAFQAAIWRWMTA**IKKA**QPSAHDIFVGNW**KPSKND**TM** : 246  
 TEA022978. : **QNATLAFQAAIWRWMTA**IKKA**QPSAHDIFVGNW**KPSKND**TM** : 246  
 TEA031227. : **QNATLAFQAAVVRWMT**PKKS**QPSAHDVFVGNW**KPTKND**TM** : 246  
 QNATLAFQAA6WRWMTa6KKa**QPSAHD6FVGNW**KP3KND**TM**

TEA003375. : **EKRIPGFGTTMNVLYGDS**VCGQ**GD**DSMN**DI**ISHYLYYLDL : 287  
 TEA022978. : **EKRIPGFGTTMNVLYGDS**VCGQ**GD**DSMN**DI**ISHYLYYLDL : 287  
 TEA031227. : **ENRVPGFGTTMNVLYGD**NVCGQ**GD**DSMN**NM**VSHYLYYLDL : 287  
 EkR6PGFGTTMNVLYGDsVCGQGD DSMN166SHYLYYLDL

TEA003375. : **MGVGR**EEAGPHD**VLSC**GEQKAFN**PTTTT**TAASS : 320  
 TEA022978. : **MGVGR**EEAGPHD**VLSC**GEQKAFN**PTTTT**TAASS : 320  
 TEA031227. : **MGVGR**EEAGPHD**KLSC**AEQKAFN**PSSTT**SS-- : 318  
 MGVGR**EEAGPHDvLSC**gEQKAFNP33TT3aass

```

          *           20           *           40
TEA008102. : -MATK-PQPTALIFSLLLFLFLLSEIQTSTGG-----GI : 31
TEA002526. : -MSPKQPHSTTPLLPLLLLSSAAIAAADQG-----GI : 32
TEA026337. : ---MVEPTVNETKNVTIAAAEAKGQ----- : 22
TEA026342. : ----MPSTVDNEISSLFATEKLGQGFVSLVFHKWSQFYGG : 37
TEA004028. : MAFRKMSLASFLFLPLLLMLLLVSGSNAG-----GI : 30
TEA007474. : -----MAFKKIILPLVMLLLVMGSNAG-----GI : 24
TEA023658. : MQNKIKPSMMAIKILICLVVLIISLANHSHGG-----TI : 33

```

6

```

          *           60           *           80
TEA008102. : AIYWGQNGNEGTLSETCDTKRFSYVNI AFLYIFGNSQTPVL : 72
TEA002526. : AIYWGQNGNEGTLTETCATGKFSYVNI AFLNKFGNGQTPFI : 73
TEA026337. : -----NGNEGTLAETCATGN YDFVNL AFLSTFGNGQTSMI : 57
TEA026342. : EISVGQNGNEGTLAETCATGN YDFVNL AFLSTFGNGQTSMI : 78
TEA004028. : AIYWGQNGNEGTLAETCATGN YDFVNL AFLSTFGNGQTPMI : 71
TEA007474. : AIYWGQNGNEGTLAETCATGN YEFVIL AFLATFGNGRTPMI : 65
TEA023658. : SLYWGQNQNEGSLADACATRN YAI VNI AFLSTFGSGRTPAL : 74

```

gqNgNEG3L etCaT 5 Vn6AFL FGng T 6

```

          *           100           *           120
TEA008102. : NLAGHCNPAANTCTFLTSDILHLCQNLGIKVMLSIGGGVGTY : 113
TEA002526. : NLAGHCNPAANGCAGVSAGIRYCQKNNIKVMLSIGGGDGSY : 114
TEA026337. : NLAGHCDPYSNGCTGLSSDIKSCQAKGIKVILSIGGGAGSY : 98
TEA026342. : NLAGHCDPYSNGCTGLSSDIKSCQAKGIKVILSIGGGAGSY : 119
TEA004028. : NLAGHCDPYSNGCTGLSSDIKSCQAKGIKVILSIGGGAGSY : 112
TEA007474. : NLAGHCDPYSKGCTGVSLDIKSCQSKGIKVILSIGGGAGSY : 106
TEA023658. : NLAGHCS--NGGCAGLSKDIKACQDGGIKVILSIGGDSTSY : 113

```

NLAGHC p gC g63 dI CQ gIKV6LSIGGg g3Y

```

          *           140           *           160
TEA008102. : SLSSQSDAKNVSEYLWNNYLGGSSSRPLGN AVLNGIDFDI : 154
TEA002526. : SLSSKADAQNVAIYLWNNFLGGSSSRPLGDAVLDGIDFDI : 155
TEA026337. : YLASSDDARQVATYLWNNFLGGQSSSRPLGAAVLDGIDFDI : 139
TEA026342. : YLASSDDARQVATYLWNNFLGGQSSSRPLGAAVLDGIDFDI : 160
TEA004028. : YLASSDDARQVATYLWNNFLGGQSSSRPLGAAVLDGIDFDI : 153
TEA007474. : SLASSEDARQVATYLWNNFLGGQSSSTRPLGAAVLDGIDFDI : 147
TEA023658. : SLSSDDARKVADYLWNNFLGGQSNTRPL---VVRGLLLSS : 151

```

L S DA Va YLWNN5LGG Ss3RPLg aV6 G6dfdi

```

          *           180           *           200
TEA008102. : ELGSTTYWDDLARYLSAYSEFGRKVYVSGAPQCFFPDAFLG : 195
TEA002526. : ELGSTKYWDDLARYLSAYNKFSGSKVYLTGAPQCFFPDSFLG : 196
TEA026337. : EGGTNQHWDDLARYLAGYSKQGKKVYLTAAAPQFFPDAWVG : 180
TEA026342. : EGGTNLYWDDLARYLAGYSKQGKKVYLTAAAPQCFFPDAWVG : 201
TEA004028. : EGGTNLYWDDLARYLAGYSKQGKKVYLTAAAPQCFFPDAWVG : 194
TEA007474. : EGGTSQHWDELARYLAGYSKQGKKVYLTAAAPQCFFPDAWVG : 188
TEA023658. : PPEG-----LCLQPPTTATPSAGTV : 170
          e g      wd laryl y      g kvy6 aPq pfPda g

```

```

          *           220           *           240
TEA008102. : GALNTGLFDYVWVQFYNNPPCQYSSGKIDDLIDSWKVIIRS : 236
TEA002526. : AALNTGLFDYVWVQFYNNPSCQYSSGNKDNLINSWKRWTSS : 237
TEA026337. : GALKTGLFDYVWVQFYNNPPCQYTSGNVGNLEDAWKQWISD : 221
TEA026342. : GALKTGLFDYVWVQFYNNPPCQYASGNVGNLEDAWKQWISD : 242
TEA004028. : GALKTGLFDYVWVQFYNNPPCQYASGNVGNLEDAWKQWISD : 235
TEA007474. : GALKTGLFDYVWVQFYNNPPCQYTSGSIGNLEDAWKQWTS : 229
TEA023658. : GVTDP---SYRWPLYAALLPALTAHS-----TRHAWSCP : 201
          gal tglfdYvW q5ynnppcqy sg      l      wk W

```

```

          *           260           *           280
TEA008102. : IEGDGKVFLLGLPAAATQAAGSGFIPPEVLKGOILPEIKKSSK : 277
TEA002526. : VNAR-RFFLGLPAAQQAAGSGFIPAAVLTGQILPEIKKSEK : 277
TEA026337. : IPAK-KILLGLPAAAPNAPGSDFIPVSDLTSKVLPAIKGSPK : 261
TEA026342. : IPAK-KILLGLPAAAPDAAGSGFIPVSDLTSIVLPAIKGSPK : 282
TEA004028. : IPAK-KILLGLPAAAPDAAGSGFIPVSDLTSIVLPAIKGYPK : 275
TEA007474. : IPAT-KILLGLPAAAPDAAGSGFIPVTDLTSKVLPAIKGSAK : 269
TEA023658. : APFS-----SLSASKPRQDPAYHLPQRS---ASAISETSA : 234
          lgLpAa a gs 5ip l      lp Ik k

```

```

          *           300           *
TEA008102. : YGGVMLWSKYWDDQSGYSASIESTV : 302
TEA002526. : YAGVMLWSKYWDDQSGYSSSIKSNV : 302
TEA026337. : YGGVMLWSKYDDQGTGYSSSIKSHV : 286
TEA026342. : YGGVMLWSKYDDQGTGYSSSVKTHV : 307
TEA004028. : YGGVMLWSKYDDQGTGYSSSIKTHV : 300
TEA007474. : YGGVMLWSKYDDQGTGYSSSIKSHV : 294
TEA023658. : VCSCWPSQLQATPPTYLNVASQP- : 258
          y gvmlwSky ddq gYs s      v

```



```

          *           20           *           40
TEA018892. : MVTLN-IKNSLQTIILAGILLAGAILPEIAVGNQCGCAAGLR : 40
TEA023307. : MASLN-IKNSFLTIIILAGILA-VMVPKIVLGQNCGCAAGLC : 39
TEA007233. : MVSLNNIKTTLLTIIILAGILS-GIIPKIVVGQNCGCSEGLC : 40
TEA007244. : MVSLT-LKNTFLTLLI---ILAGVVLPEIVVGQNCGCATGYC : 37
TEA019135. : MVSLT-LKNTFLTLLI---ILAGVVLPEIVVGQNCGCATGYC : 37
TEA028279. : MVSKT---NHLTFTIILAGILA-GALPALISAQNCGCASDMC : 37
TEA031484. : MVSLN-IKNSLLTIIILVGIIT----- : 20
TEA018894. : MVSLN-IKNSLLTIIILVGIIT-GFVVPKIVLGQNCGCPADLC : 39
TEA028282. : MVSFN-FKTYLLTIIILAGILA----- : 20
TEA014412. : MVSFN-FKTYLLTIIILAVIIT----- : 20

```

Mv3 k lT Il IL

```

          *           60           *           80
TEA018892. : CSHYGYCGTGNAYCGAGCQSGPCT-----GSNGASV : 71
TEA023307. : CSQFGYCGTGDAYCGAGCQSGPCTSS-----GSNGASV : 72
TEA007233. : CSKFGYCGTGDDYCGSGCQSGPCATLPFFFSLICFPDALDP : 81
TEA007244. : CSQAGYCGQDAAYCGTGCQSGPCT-----GSNGVSV : 68
TEA019135. : CSRFGYCGQDADHCGTGCQSGPCT-----GSNGVSV : 68
TEA028279. : CSQYGYCGTTDAYCGSGCQEGPCFATP-----SPSNVSV : 71
TEA031484. : ----- : -
TEA018894. : CSQFGYCGSDNAYCGAGCQSGPCTSS-----GSNGSSI : 72
TEA028282. : -----GSNGASV : 27
TEA014412. : -----GSNGASV : 27

```

s

```

          *           100           *           120
TEA018892. : SNIVTQSFFNGIINQASAGCA----- : 92
TEA023307. : PDIVTQAFFDGIINQAPAGCV----- : 93
TEA007233. : GIVVTQAFFDGIINQAPAGCVGVDTSLPKSLPLPVGEVPES : 122
TEA007244. : SDIVTQAFFDGIINQAPAGCV----- : 89
TEA019135. : SDIVTQTFFDGIINQAPAGCV----- : 89
TEA028279. : SDIVTQAFFDGIIGEADASCA----- : 92
TEA031484. : ----- : -
TEA018894. : GDIVTQSFFNGIINQAADGCA----- : 93
TEA028282. : SNIVTQSFFNGIIKQASAGCA----- : 48
TEA014412. : SNIVTQSFFNGITNQASAGCA----- : 48

```

vtq ff gii a agc

```

          *           140           *           160
TEA018892. : ----- : -
TEA023307. : ----- : -
TEA007233. : VVGKMIGTSLGRVNPMLMLQNLWCWVRIVVVVKDYVAASSGTV : 163
TEA007244. : ----- : -
TEA019135. : ----- : -
TEA028279. : ----- : -
TEA031484. : ----- : -
TEA018894. : ----- : -
TEA028282. : ----- : -
TEA014412. : ----- : -

```

```

          *           180           *           200
TEA018892. : -----GKSFFTRS AFLN AIG : 107
TEA023307. : -----GTSFYTRS AFLN ALS : 108
TEA007233. : ALAMTTVVQGI FRWDNQSSSCWMCRVGKSFFARS AFLN ALG : 204
TEA007244. : -----GTSFYTRS AFLN ALS : 104
TEA019135. : -----ETSFYTRS AFLN ALS : 104
TEA028279. : -----GKSFYTRS L FLEALN : 107
TEA031484. : -----GKSFFTRS AFLEALV : 35
TEA018894. : -----GKSFFTRS AFLEALV : 108
TEA028282. : -----GKSFYTRS AFLKATG : 63
TEA014412. : -----GKRFYTRS AFLK AIG : 63
          g sF5tRSaFL A

```

```

          *           220           *           240
TEA018892. : SY-----PSFGTTG-----TIDDSK----- : 122
TEA023307. : SFSALHFL-MPSAPTLRLA PLELLTILSAKLLLSSRMPRMR : 148
TEA007233. : SYPSFGTTGTADDSKREIAAFFFAHATHETGLFCNIEEIDGA : 245
TEA007244. : SFSAFGTIGTDDSKREIAAFFFAHATHETGYFCNIDE-TSP : 144
TEA019135. : SFSAFGTVGTDDSKREIAAFFFAHATHETGYFCNIDE-KSP : 144
TEA028279. : LYPLFGRDGSVDDSKREIAAFFFAHATHETGHFCYIEEIDGA : 148
TEA031484. : SYPSFGTTGTADDSKREIAAFFFAHATHETGFFCNIEEIDGA : 76
TEA018894. : SYPSFGTTGTADDSKREIAAFFFAHATHETGFFCNIEEIDGA : 149
TEA028282. : SYPSFGTTGTDDSKREIAAFFFAHATHETGHFCYIEEINGA : 104
TEA014412. : SYPSFGTTGTDDSKREIAAFFFAHATHETGHFCYIEEINGA : 104
          s5 fg g ddskre aaffah the g fc i e

```

```

          *           260           *           280
TEA018892. : -----SNTQYPCAPNKQYYGRGPLQLSWNYN----- : 148
TEA023307. : LDNYCDPSKTQYPCAPNKNYGRGPLQLTWNYN----- : 181
TEA007233. : SKTYCDQSNTQYPCAPNKNYGRGPLQLSWNYN----- : 278
TEA007244. : SSNYCNATYTOYPCAPNKSYGRGPLQLSWNYN----- : 177
TEA019135. : ISNYCDPKYTNYPCAPNKSYGRGPLQLSWNYN----- : 177
TEA028279. : SKDYCDENNTQYPCVAGKGYGRGPLQLSWNYN----- : 181
TEA031484. : SKNYCDPSNTQYPCSPNKNYGRGPLQLSWNYN----- : 109
TEA018894. : SKNYCDPSNTQYPCAPNKNYGRGPLQLSWNYNSDSVVSFK : 190
TEA028282. : SRNYCDSSTQYRCAPNKKYGRGPLQLSWNYN----- : 137
TEA014412. : SRNYCDSSTQYRCAPNKKYGRGPLQLSWNYN----- : 137

```

yc TqYpC pnK YYGRGPLQL3WNYN

```

          *           300           *           320
TEA018892. : ----- : -
TEA023307. : ----- : -
TEA007233. : ----- : -
TEA007244. : ----- : -
TEA019135. : ----- : -
TEA028279. : ----- : -
TEA031484. : ----- : -
TEA018894. : TALWFWMNNVHNVINSFGFATIRAINSIECNGNNPNAVNAR : 231
TEA028282. : ----- : -
TEA014412. : ----- : -

```

```

          *           340           *           360
TEA018892. : -----YDPASRSIGFDGLNNPETVAKDPVVSFKT : 177
TEA023307. : -----YGPAGQSIGFDGLNNPETVATDSVVSFKT : 210
TEA007233. : -----YGPAGESIGFDGLNNPETVATDSVVSFKT : 307
TEA007244. : -----YGPAGDFIGFDGLANPETVATDSLVSFKA : 206
TEA019135. : -----YGPAGDFIGFDGLANPETVATDSLVSFKA : 206
TEA028279. : -----YGPAGKSIGFDGLNNPEIVATDAAVSFKT : 210
TEA031484. : -----YGPAGQSIGFDGLNNPEIVATDSVVSFKT : 138
TEA018894. : VKGPLQLSWNYNYGPAGQSIGFDGLNNPEIVATDSVVSFKT : 272
TEA028282. : -----YGPAGRSIGFDGLNNPEIVAKDPVVSFKT : 166
TEA014412. : -----YGPAGRSIGFDGLNNPEIVAKDPVVSFKT : 166

```

YgPAg sIGFDGLnNPE VA D VSFkT

```

*           380           *           400           *
TEA018892. : ALWFWMNNVHSKMNS--GFGATIQAINGGECNGNRPDVN : 215
TEA023307. : ALWFWMNNVHNVINS--GFGATIRAIN-SIECNGNPNNAVN : 248
TEA007233. : ALWFWMNNIHNVLNS--GFGATIQAINGGECNGNRPDVN : 345
TEA007244. : ALWFWMQNVHSMVTGQGFATIRAINGAVECDGKRTDLVT : 247
TEA019135. : ALWFWMQNVHSMVTGQGFATIRAINGDVECDGKPPDLVT : 247
TEA028279. : ALWYWMNKVHSIIVSGQGFGETIRAINGAIECDGGNTNTVN : 251
TEA031484. : ALWFWMNNVHNVINS--GFGATIRAIN-SIECNGNPNNAVN : 176
TEA018894. : ALWFWMNNVHNVINS--GFGATIRAIN-SIECNGNNSNAVN : 310
TEA028282. : ALWFWMNNVHSKMNS--GFGATIRAINGNIECNGKDSNSVS : 205
TEA014412. : ALWFWMNNVHSKMKS--GFGATIRAINGNIECNGKDPNSVS : 205

```

ALW5Wmnn6H 6 3 GFGaTIRAIN EC1G 1 V

```

           420           *           440           *
TEA018892. : ARVKYYT-----DYCNQLGVSSG----- : 233
TEA023307. : ARVKYYT-----DYCNQLGVAPG----- : 266
TEA007233. : ARVKYYT-----DYCNQLGVAPDVTVSYYRWFVVKPSPETC : 381
TEA007244. : ARVNLYT-----NYCSQFCVAPG----- : 265
TEA019135. : ARVNLYT-----NYCSQFCVAPG----- : 265
TEA028279. : ARVEYYQ-----EYCNQLGVAPG----- : 269
TEA031484. : ARVKYYT-----DYCNQLGVAPGNNLQ-----C-- : 199
TEA018894. : ARVKLSRPPWAI DLKSTLELLVSCSLG-----SGG : 340
TEA028282. : ARVKYYT-----DYCKQFCVSPGRATHIDVVTGEKRKHGDE : 241
TEA014412. : ARVKYYT-----DYCKQFCVSPGRATHIDVVTVEKRKHGDE : 241

```

ARV yt yc q g6 pg

```

           460           *           480           *
TEA018892. : NNLRC----- : 238
TEA023307. : NNLQC----- : 271
TEA007233. : RNVQHHREVAGVSPKVVHRSIKNVNRSRNIQNVHWTLRTSL : 422
TEA007244. : DNLSC----- : 270
TEA019135. : DNLRC----- : 270
TEA028279. : DNLVC----- : 274
TEA031484. : ----- : -
TEA018894. : GDIRSPFPFP--FPLCLRRLSRPLWAVDLKSTLELLVSLAL : 379
TEA028282. : GDDAMEIDKFWMEKNAKYDIGIGINRAAHKLLKHPVIKKA : 282
TEA014412. : GDDAMEIDKFWMEKNAKYNIGA-----ELFEQIIVR--- : 272

```

|            | 500 | *                                             | 520 | *           |   |     |
|------------|-----|-----------------------------------------------|-----|-------------|---|-----|
| TEA018892. | :   | -----                                         | :   | -----       | : | -   |
| TEA023307. | :   | -----                                         | :   | -----       | : | -   |
| TEA007233. | :   | EIHRNV-----                                   | :   | -----       | : | 428 |
| TEA007244. | :   | -----                                         | :   | -----       | : | -   |
| TEA019135. | :   | -----                                         | :   | -----       | : | -   |
| TEA028279. | :   | -----                                         | :   | -----       | : | -   |
| TEA031484. | :   | -----                                         | :   | -----       | : | -   |
| TEA018894. | :   | WIV-----                                      | :   | -----       | : | 382 |
| TEA028282. | :   | ETTSCGPEAPFRGLLTKLSGSV<br>PKTEKEGITNRQCTQNRER | :   | -----       | : | 323 |
| TEA014412. | :   | QFLSVGTAGSFKSVMG-----                         | :   | RTESVR----- | : | 294 |

|            |   |       |   |     |
|------------|---|-------|---|-----|
| TEA018892. | : | ----- | : | -   |
| TEA023307. | : | ----- | : | -   |
| TEA007233. | : | ----- | : | -   |
| TEA007244. | : | ----- | : | -   |
| TEA019135. | : | ----- | : | -   |
| TEA028279. | : | ----- | : | -   |
| TEA031484. | : | ----- | : | -   |
| TEA018894. | : | ----- | : | -   |
| TEA028282. | : | INQLQ | : | 328 |
| TEA014412. | : | ----- | : | -   |

```

                *           20           *           40
TEA019378. : -----MDCDS-----ISP : 8
TEA009567. : -MAIKKLTSLTVLALFCIT---IMDCDS-----ISP : 27
TEA021168. : -MMAEKKFLSFFLAIIIGVAGNGIASCNASILMSSPPY---T : 37
TEA018432. : MSTISNLYHTHLLAAIIGEKESLFSWCSSLDLTSSGKYGIRT : 41
TEA008468. : MAGLKDYYN--SYLCVFVILTITCSCAM-----AS : 28
TEA024621. : ----- : -
TEA018426. : MADFKGYNYYYYYLGVFVILTTTTSCSM-----AT : 30
TEA030241. : --MASKTLLCLLICPLLFLQLHFSSAQT----- : 26
TEA009345. : --MASKTLLCLLICPLLFLQFHFSSAQT----- : 26
TEA013798. : --MASKTLLCLLICPLLFLQLHFSSAQT----- : 26
TEA009364. : --MASKTLLCLFFCPILFLQFHFSSAQT----- : 25
TEA013812. : --MSLKIAISVFFVLLLPLEVSSSEPKT----- : 26
TEA015728. : -MASSKLLVCTCIFHILFTTSSIIHAAPTNSK----- : 31
TEA015711. : -MASSKLLVCLCIFHVLIATSSLIQAAPTNSK----- : 31
TEA015702. : -MASSKILVCLCIFHVLIATSSLIQAAPTNSK----- : 31
TEA012713. : -MASSTLLVSLFIFQVLFVT-----PAYSK----- : 24
TEA025942. : -MEINKLFLITTLF-ILQSQLFLSPIQSSNSG----- : 30
TEA001202. : -----MIKLHFFLLHIVTAFALIFPPFCNGK----- : 26
TEA004985. : -----MFSLEIQENSKLSENTSHRHFR----- : 22

```

```

                *           60           *           80
TEA019378. : AIPATKSLGYLSPNP-----YP : 25
TEA009567. : AIPAPKSLGYLSPNP-----YP : 44
TEA021168. : SKP---HKITPPSMP-----PFSPSPAPYAPGLAP : 64
TEA018432. : GVPESKAKIFWAAGPGSHVRDGGHTCEMGATRARWEP-TGP : 81
TEA008468. : TSP----- : 31
TEA024621. : ----- : -
TEA018426. : TSP----- : 33
TEA030241. : ----- : -
TEA009345. : ----- : -
TEA013798. : ----- : -
TEA009364. : ----- : -
TEA013812. : ----- : -
TEA015728. : ----- : -
TEA015711. : ----- : -
TEA015702. : ----- : -
TEA012713. : ----- : -
TEA025942. : ----- : -
TEA001202. : ----- : -
TEA004985. : ----- : -

```

```

          *           100           *           120
TEA019378. : FYFPFVPRGIKAAWPS--GNGFPASSIDTSYFTHIYYAFL : 64
TEA009567. : FYFPFVPRGIKAAWPS--GNGFPASSIDTSYFTHIYYAFL : 83
TEA021168. : ARALPSG-GIKGGYWPSIAERFPSSITPKYFTHLFYALV : 104
TEA018432. : FLALPSD-GIKGGYWPSIAERFPSTIPSKYFTHLFYAEV : 121
TEA008468. : -----SQAVKGGYWPS-WASDFPQSAIDTTLFTHIYYAFL : 65
TEA024621. : ----- : -
TEA018426. : -----SDVIKGYWPS-GASDLPPSSIDTTLFTHIYYAFL : 67
TEA030241. : -----VVEASYWFP--ESGFLASDIDSTLFTHLFCAFA : 57
TEA009345. : -----VVEASYWFP--ESGFLASDINSTLFTHLFCAFA : 57
TEA013798. : -----VVEASYWFP--ESGFLASDIDSTLFTHLFCAFA : 57
TEA009364. : -----VVEASYWFP--ESGFLASDIDSTLFTHLFCAFA : 56
TEA013812. : -----WINAGYWYS--GSESPVPDIDSTLFTHLCAFA : 57
TEA015728. : -----LFREYIGADGNNIRFSDVPIPNVDFHFILSEFA : 64
TEA015711. : -----LFREYIGADGNNISFSDVPIPNVDFHFILSEFA : 64
TEA015702. : -----LFREYVIGADGNNIRFSDVPIPNVDFHFILSEFA : 64
TEA012713. : -----LFREYIGADDKNVSESDVPIPNVDFHFILSEFA : 57
TEA025942. : -----LFREYIGALFNNVKESDVPINPNIDFHFILAF : 63
TEA001202. : -----VMMEYIGATGKPVTFDAVPIEPNITFHFILSEFA : 59
TEA004985. : -----NPVLAYITPWNSRGYDIAKTFNSKFTHLSPVWY : 55
          i           h

```

```

          *           140           *           160
TEA019378. : LPEPATYKLNITTT-----FDQEKLPFEMGALRARNPPIK : 98
TEA009567. : LPEPATYKLNITTT-----FDQEKLPFEMGALRARNPPIK : 117
TEA021168. : LPDATSYQLFVTP-----LDDQWMGNFTATLHAQMTPAV : 138
TEA018432. : LPDATSYQLFVTP-----LDDQWMG-----ISPPP : 146
TEA008468. : SPNNATFKFDISD-----STASMLLNFTSTLHAKNPPVK : 99
TEA024621. : ----- : -
TEA018426. : SPNNVTFKFDISN-----STASMLLDFTSTLHAKKPPVK : 101
TEA030241. : NLSSTINQVIVSP-----SNNAPFSQFTSTVQLKNPSVK : 91
TEA009345. : NLNSTINQVTVSS-----SNNAPFSQFTSTVQLKNPSVK : 91
TEA013798. : NLSSTINQVIVSP-----SNNAPFSQFTSTVQLKNPSVK : 91
TEA009364. : NLNSTINQVTVSS-----SDDAPFSQFTSTVQLKNPSVQ : 90
TEA013812. : YINSSYELSIPT-----SAEQYFSTFTNIVKQKNPSVI : 91
TEA015728. : IDYTNITASPTPTNGDFSAFWDTKNLSPSQVSSIKAHHPNVK : 105
TEA015711. : NDYTNIDAPTPTNGDFSAFWDTNNLSPFQVSSIKARHPNVK : 105
TEA015702. : IDYTNITASPTPTNGDFSAFWETNNLSPSQASSIKARHPNVK : 105
TEA012713. : IDYTNITSSPSPTNGEFIAWQNLNPSRISSIKADHPNVK : 98
TEA025942. : IDYTSISSPSPTNGQFNIFWDTDNLSPSQVSSIKNQHSNVK : 104
TEA001202. : IDAD--PSGNPQNGTFSPYWVP-TLTPDSIAAIKSTHPNVK : 97
TEA004985. : DLKSQGTKLVLEG-----RHNADKGWLSLRMKGNAIV : 88

```

```

          *           180           *           200
TEA019378. : TLLSIGGGGNDP--IVFSNMASNESTRAIFINSTIEVARKY : 137
TEA009567. : TLLSIGGGGNDP--IVFSNMASNESTRAIFINSTIEVARKY : 156
TEA021168. : AFLSIGGGGNSNS--STFSNMASSHDTRAAFIKSTIDVARKY : 177
TEA018432. : SMPKIGGGGNSNS--STFSNMASSHDTRAAFIKSAIDVARKY : 185
TEA008468. : TIFSVGGGGEGP--VIFSNMASTGQSRRSFIESSIEVARKF : 138
TEA024621. : -----MASTGHSRRSFIESSIEVARKF : 22
TEA018426. : TLFSIGGAGEDL--SIFSKMVSSGHSRRSFIESSIEVARKF : 140
TEA030241. : TLLSIGGGKSDQ--TAFASMASQSATRKTIFIDSSIELARSY : 130
TEA009345. : TLLSIGGGSSNR--TAFASMASQSATRKTIFIDSSIKLARSY : 130
TEA013798. : TLLSIGGGKSDR--TAFASMASQSATRKTIFIDSSIELARSY : 130
TEA009364. : TLLSIGGGSSDQ--TAFASMVSQSATRKTIFIDSSIQLARSY : 129
TEA013812. : TILSIWDGTTNS--SIFFSMVSVQASQRKTFIQSTIKIARLY : 130
TEA015728. : VAMSLGGDTVNN-HTVFFSPATISSWVRNAISSITRIVKEN : 145
TEA015711. : VAMSLGGDTASNHPVFFSPATISSWVRNAISSITRIVKEN : 146
TEA015702. : LAMSLGGDTVSN-HTVFYSPATISSWVRNAISSINRIVKEN : 145
TEA012713. : VAMSLAGDSVND-HFVYFSPASINSWVSNAISSITQIVREY : 138
TEA025942. : VALSIGGDSVGD-SKAYFSPTSVDSWVSNSITSLTQIIKQY : 144
TEA001202. : ALASLSGWSLQNKVLRWYTPSNPQLWISNAFASLKSIIITTY : 138
TEA004985. : LPRVLEAFPNE-----LLKKKQQRKKAIDLIVRECEEM : 122
          s g                               i s

```

```

          *           220           *           240
TEA019378. : GFDGVDLDWEFPENHTDMFHLALLYKQWRKTLKREAKAIKK : 178
TEA009567. : GFDGVDLDWEFPENHTDMFHLALLYKQWRKTLKREAKAIKK : 197
TEA021168. : DFDGLDLDWEFPQNPQDMTRFSMLFYEWRTATNMESLASGK : 218
TEA018432. : GFDGLDLDWEFPQNPQDMTRFSMLFYEWCTA----- : 216
TEA008468. : GFDGVDLDWEFPQNPKDMENLGQLLHEWRRAKVHQEAKATGR : 179
TEA024621. : GFDGVDLDWEFPQSPKDMENLGQLLHEWRRAKVHQEGKATGR : 63
TEA018426. : GFNGIDLWEFPQNPKEMENLGLLLHEWRAMVHKESKATGQ : 181
TEA030241. : GFLGLDLDWEYPKSASEINNFGLLFNEWRSAVMAEATATGK : 171
TEA009345. : GFQGLDLDWEYPQSASEINNFGLLFNEWRSAVTAEATATGK : 171
TEA013798. : GFLGLDLDWEYPKSASEINNFGLLFNEWRSAVMAEATATGK : 171
TEA009364. : GFLGLDLDWEYPQSASEINNFGLLFTEWRSAVAAEAAATGN : 170
TEA013812. : GFQGIDMWGVSLSTDMMNMTNMGTLFDEWRAAINSESTSS-- : 169
TEA015728. : NLDGIDIDYEHFH--ADPNTFTECIGQLIFNLKQS----- : 178
TEA015711. : NLDGIDINYEHFH--ADPNTFAECIGQLIFNLKQR----- : 179
TEA015702. : NLDGIDIDYEHFH--ADPNTFAECMGQLIFNLKQS----- : 178
TEA012713. : NLDGIDIDYEHFN--ADPDTFAECIGHLLFYLKEE----- : 171
TEA025942. : NLDGIDIDYEHFNN-TDPNTFPECIGQLITKMKEN----- : 178
TEA001202. : HLDGIDVDYENFP--KHTESFAYCIGELITLLKNQ----- : 171
TEA004985. : EYDGIIVLESWSRWAAAYRVLHDPDMRNTALQFIKEFG----- : 158
          G6d6 e

```



```

          *           260           *           280
TEA019378. : TRLLLSAVYYATKITLLGKARTYPGNTIRKYVDWVSPMCF : 219
TEA009567. : TRLLLSAVYYATKITLLGKARTYPGNTIRKYVDWVSPMCF : 238
TEA021168. : PRLLLSAAVYFASNFFLAKIPRTYPPGAIKNFLDFVNPMCY : 259
TEA018432. : ----- : -
TEA008468. : TPLLLTAAVYFSVDFFLSDVQRSYPVGSAKKNLDWINVMCY : 220
TEA024621. : TPLLLTAAVYFSVDFLLSDVQRSYPVGSVKKNLDWINVMCY : 104
TEA018426. : APLLLTAAVYFSVDFFLYDVQRSYPVDSIGKNLDWINAMCY : 222
TEA030241. : PALLLTAAVNYASTVNG----VNYP IQSIANS CDWVNL MAY : 208
TEA009345. : PALLLTAAVYYASTVNG----VNYP IQSIANS CDWVNL MAY : 208
TEA013798. : PALLLTAAVNYASTVNG----VNYP IQSIANS CDWVNL MAY : 208
TEA009364. : PTLLLTAAVNYASTVNG----VNYP IQPIANS CDWVNL MAY : 207
TEA013812. : -RLIFIMSGHYSPV VDS----DKYP VKSVERNLDWVHI IAY : 205
TEA015728. : -----KIVSEASIAPYDDNNVQPHY LALWSKYGHL IDYVNF : 214
TEA015711. : -----KIVSEASIAPYDDNNVQPHY LAPWRKYGHL ID---- : 211
TEA015702. : -----KIVSEASIAPYDDNNVQPHY LALWRKYGHL IDYVNF : 214
TEA012713. : -----KIVSEFTSIAPFEDDSVQQHY LALWSKYGHL IDYVNF : 207
TEA025942. : -----GLISFASIAPFDDQVQSHY LALWKTYGNL IDYVNF : 214
TEA001202. : -----SVVTVATIAPFYSTSAP--YVDL FNQYGN AIDYVNH : 205
TEA004985. : ----QALHAVSLERN SKQRLQLVYV I GPPYSEKLQEHDFGP : 195

```

```

          *           300           *           320
TEA019378. : DYHG SWER-VTGEHSALDDPNS-KISTTFGIQSWIEVGVPP : 258
TEA009567. : DYHG SWER-VTGEHSALDDPNS-KISTTFGIQSWIEVGVPP : 277
TEA021168. : DYHG SWDTSITGAQAALFDKSS-NVSTSYGISTWVENGVP : 299
TEA018432. : ----- : -
TEA008468. : DYHG SWDTSATGAQAALFDPNS-NITTSYGLRSWIEAGLPP : 260
TEA024621. : DYHG SWDTSATGAQAALFDPKS-NISTSYGLRSWIKAGLPP : 144
TEA018426. : DYHG GWETSTTGAQAALFDPKS-NVSTSYGLQSWITAGLPP : 262
TEA030241. : DFYGP TRSNVTNPPAALFDP P S GSVSGSYGIKSWIQAGLSP : 249
TEA009345. : DFYGP TWSSVTNPPAQLFDP P S GSVSGSYGIKSWIQAGLNP : 249
TEA013798. : DFYGP TWSSVTNPPAQLFDP P S GSVSGSYGIKSWIQAGLSP : 249
TEA009364. : DFYAP NYSTVTKPPAELFDP P S GSVSGSYGIQSWIQAGLSP : 248
TEA013812. : DYYLSKRDNFTGGHAALYDPSS-NLNTDYGIKEWIGIGLPA : 245
TEA015728. : QFYAYDKGTTIPQFLQH FETQTSNYKGGKVLV SFST DASGG : 255
TEA015711. : -----CELPILCL----- : 219
TEA015702. : QFYAYDKGTTIPQFLQH FETQTSNYKGGKVLV SFGT DASGG : 255
TEA012713. : QFYAYDKRTTVAQFLQY FETQSANYKGGKILV SFSTDKSGG : 248
TEA025942. : QFYGYDQGTNVSQFMAY FETQSSNYNGGKVLV SFISDGSRG : 255
TEA001202. : QFYT-DKVKTPQAYLEAFRNRT EMYGKDKVLV PSYEV D G-RG : 244
TEA004985. : EDLKSLSDDVDGFSLMTYDYSNPQH PGNAPLKW I HSTLQL : 236

```

|            |   |                                           |       |     |     |
|------------|---|-------------------------------------------|-------|-----|-----|
|            | * | 340                                       | *     | 360 |     |
| TEA019378. | : | KKLVMG                                    | ----- | :   | 264 |
| TEA009567. | : | KKLVMG                                    | ----- | :   | 283 |
| TEA021168. | : | EKLVMG                                    | ----- | :   | 305 |
| TEA018432. | : | -----                                     | ----- | :   | -   |
| TEA008468. | : | SKLIMG                                    | ----- | :   | 266 |
| TEA024621. | : | SKLIMG                                    | ----- | :   | 150 |
| TEA018426. | : | SKLIMG                                    | ----- | :   | 268 |
| TEA030241. | : | EKMVFGMPFLGYAWTLVNADNHGFKAPSSGLVGSDEGAMGY |       | :   | 290 |
| TEA009345. | : | KKMVF                                     | ----- | :   | 254 |
| TEA013798. | : | EKMVF                                     | ----- | :   | 254 |
| TEA009364. | : | QNMVF                                     | ----- | :   | 253 |
| TEA013812. | : | SKMVLG                                    | ----- | :   | 251 |
| TEA015728. | : | LKPCKG                                    | ----- | :   | 261 |
| TEA015711. | : | -----                                     | ----- | :   | -   |
| TEA015702. | : | LKPCKG                                    | ----- | :   | 261 |
| TEA012713. | : | LKPCKG                                    | ----- | :   | 254 |
| TEA025942. | : | LSPENG                                    | ----- | :   | 261 |
| TEA001202. | : | IQGDAF                                    | ----- | :   | 250 |
| TEA004985. | : | LLGTSS                                    | ----- | :   | 242 |

|            |   |                                          |       |     |     |
|------------|---|------------------------------------------|-------|-----|-----|
|            | * | 380                                      | *     | 400 | *   |
| TEA019378. | : | -----                                    | ----- | :   | -   |
| TEA009567. | : | -----                                    | ----- | :   | -   |
| TEA021168. | : | -----                                    | ----- | :   | -   |
| TEA018432. | : | -----                                    | ----- | :   | -   |
| TEA008468. | : | -----                                    | ----- | :   | -   |
| TEA024621. | : | -----                                    | ----- | :   | -   |
| TEA018426. | : | -----                                    | ----- | :   | -   |
| TEA030241. | : | KQIKAFITQNQATTMYNSSVSDYCYSGTTWIGYDDIQSII |       | :   | 331 |
| TEA009345. | : | -----                                    | ----- | :   | -   |
| TEA013798. | : | -----                                    | ----- | :   | -   |
| TEA009364. | : | -----                                    | ----- | :   | -   |
| TEA013812. | : | -----                                    | ----- | :   | -   |
| TEA015728. | : | -----                                    | ----- | :   | -   |
| TEA015711. | : | -----                                    | ----- | :   | -   |
| TEA015702. | : | -----                                    | ----- | :   | -   |
| TEA012713. | : | -----                                    | ----- | :   | -   |
| TEA025942. | : | -----                                    | ----- | :   | -   |
| TEA001202. | : | -----                                    | ----- | :   | -   |
| TEA004985. | : | -----                                    | ----- | :   | -   |

```

          420          *          440          *
TEA019378. : -----LPLYGRTWTIQDPKVNGIGAPAVVP : 289
TEA009567. : -----LLLYGRTWTIQDPKVNGIRAPAVGP : 308
TEA021168. : -----LPMYGRTWKLKDPNQSGIGAPANGT : 330
TEA018432. : ----- : -
TEA008468. : -----LPLYGRTWQIKDPRSHGIVGAPAVSV : 291
TEA024621. : -----LPLYGRTWRILKDPDRSHGIVGAPAVAV : 175
TEA018426. : -----LPLYGRTWQIKDPRSHDVGAPTGVV : 293
TEA030241. : AKVSYAKQQGLLGVLGMPFYGAWKLVNANNHGFKAPSSGP : 372
TEA009345. : -----GMPFYGAWKLVNANNHGFKAPSSGP : 280
TEA013798. : -----GMPFLGYAWTIVNADNHGFKAPSSGL : 280
TEA009364. : -----GLPFYGAWKLVNANDHGFNAPTRGP : 279
TEA013812. : -----LAYHGYAWTIVSPKENGIGAPARGL : 276
TEA015728. : -----SLQPAACSKVK-----MAQLEA : 278
TEA015711. : ----- : -
TEA015702. : -----FFTACSMIKSQGELHGFIFIWSAD : 284
TEA012713. : -----FFDACSVMIKSQDKLHGFIFIWSAD : 277
TEA025942. : -----FFSACSRILKDQQELHGFVWCAD : 284
TEA001202. : -----FVALDLLEENGFDVNGVMIFISAD : 273
TEA004985. : -----SGAQSIAHKIFIGINFYGNDF : 263

```

1

```

          460          *          480          *
TEA019378. : GPG-GGVLVYSQILDFNTQNNATVKFDKQSSCFYSYAGGSW : 329
TEA009567. : GPG-GGVLVYSQILDFNTE----- : 326
TEA021168. : GPGYLGVMKYSDIVDFNLANNASVVFDEETVSTYSYAGTDW : 371
TEA018432. : ----- : -
TEA008468. : GPGSEGVLTYSEVEAFNRANNATVVYDSVTVSTYSVTGTSW : 332
TEA024621. : GPGSDGVLTYSEVEAFNRANNATVVYDGVTVSTYSVAETSW : 216
TEA018426. : GPGSDGVLTYSMVEAFNKVNNAMVVYDMETVSTYSIAGTSW : 334
TEA030241. : VGSGDGSMGYKQIKAFITQIQATTVYNSSVSDYCYSGTTW : 413
TEA009345. : VGSGDGSMGYKQIKAFITQIQATTVYNSSVSDYCYSGTTW : 321
TEA013798. : VGSDGAMGYKQIKAFITQIQATTVYNSSVSDYCYSGTTW : 321
TEA009364. : VGSGDGSMGYNEIKAFIAQIQATTVYNSSVSDYCYSGTTW : 320
TEA013812. : AITQDGSMYSYKIKWYMKSYKLASMYNATYVNYCTFGLFW : 317
TEA015728. : EKKHDKVVDEMLAILNAKAEASRLKEVEQEVGKDVDEEQ-- : 317
TEA015711. : ----- : -
TEA015702. : DSKANGFPSEMQSQAQNDFSAVLLMMREVRTPSWHGDFVYV : 325
TEA012713. : DSKKAEALCKSHQPWLHQTSSSLCSSFKSSLSPQQTQSSSL : 318
TEA025942. : TSKAKG-----LGFGYEKQSQALLAN----- : 305
TEA001202. : ASASGG-----YCYERKSQAFLNSTSSA----- : 297
TEA004985. : TLSEGTMIICHFQSILSHLVSNTMTSDKVDANLEDAFHPLKS : 304

```

|            | 500 | *     | 520              | *                     |       |
|------------|-----|-------|------------------|-----------------------|-------|
| TEA019378. | :   | VG    | YDDVGSVKLKVR     | FALARSLG              | : 351 |
| TEA009567. | :   | ----- | -----            | -----                 | : -   |
| TEA021168. | :   | IG    | YDDMESISNKKLVMGL | PMYGR                 | 412   |
| TEA018432. | :   | ----- | -----            | -----                 | : -   |
| TEA008468. | :   | IG    | YDDVRSTTVKIEFAQ  | GLGLR                 | : 354 |
| TEA024621. | :   | IG    | YDDDRSTTVKIEFAQ  | VLGLR                 | : 238 |
| TEA018426. | :   | IG    | YDDTKSTIVKIKFAQ  | ALGLR                 | : 356 |
| TEA030241. | :   | IG    | YDDIQSITAKVSYAK  | QQDCLGTF              | 446   |
| TEA009345. | :   | IG    | YDDIQSITAKVSYAK  | QQGLL                 | : 344 |
| TEA013798. | :   | IG    | YDDIQSITAKVSYAK  | QQGLL                 | : 344 |
| TEA009364. | :   | IG    | YDDIQSITAKVSYAK  | QQGLL                 | : 343 |
| TEA013812. | :   | IG    | FDDVEAIRTKVSYAK  | DKGLL                 | : 340 |
| TEA015728. | :   | ----- | -----            | -----                 | : -   |
| TEA015711. | :   | ----- | -----            | -----                 | : -   |
| TEA015702. | :   | YS    | FYL              | -----                 | : 330 |
| TEA012713. | :   | TY    | I                | GAGGKNVSPDPVPINPNVDFH | 359   |
| TEA025942. | :   | ----- | -----            | -----                 | : -   |
| TEA001202. | :   | ----- | -----            | -----                 | : -   |
| TEA004985. | :   | TH    | VGSCWRF          | -----                 | : 313 |

|            | 540 | *     | 560                                    | *                            |       |
|------------|-----|-------|----------------------------------------|------------------------------|-------|
| TEA019378. | :   | ----  | GYFFWALGQDKDWTISREAP                   | KKELCCS                      | : 380 |
| TEA009567. | :   | ----- | -----                                  | -----                        | : -   |
| TEA021168. | :   | TG    | PGYL                                   | RVMKYSDIVDFNLANNASVVFDEET    | 445   |
| TEA018432. | :   | ----- | -----                                  | -----                        | : -   |
| TEA008468. | :   | ----  | GYFFWAVNGDHDWKISTQGRVISNVK             | -----                        | : 380 |
| TEA024621. | :   | ----  | GYFFWAVNGDYDWKISTQGRVISNVK             | -----                        | : 264 |
| TEA018426. | :   | ----  | EYFFWAVNGDYNWKISTQG                    | -----                        | : 375 |
| TEA030241. | :   | PT    | KLEYFRQEF                              | SIPADVHLKLAGDNDT             | 479   |
| TEA009345. | :   | ----  | YFSWHVGV                               | DNNWALSQRGLSQSIP             | : 368 |
| TEA013798. | :   | ----  | YFSWHVGV                               | NHDELKPI                     | 364   |
| TEA009364. | :   | ----  | YFSWHVGV                               | DNNWALSQKDPNDPSSSSG          | 379   |
| TEA013812. | :   | ----  | YAVWQVP                                | NDDNWLTKAALGEDKKQGNKKWLLVILL | : 376 |
| TEA015728. | :   | ----- | -----                                  | -----                        | : -   |
| TEA015711. | :   | ----- | -----                                  | -----                        | : -   |
| TEA015702. | :   | ----- | -----                                  | -----                        | : -   |
| TEA012713. | :   | TNG   | NFSAYWDKENLNPSQISSIKADHPNVKVAMSVAGDSVN | -----                        | : 400 |
| TEA025942. | :   | ----- | -----                                  | -----                        | : -   |
| TEA001202. | :   | ----- | -----                                  | -----                        | : -   |
| TEA004985. | :   | ----- | -----                                  | -----                        | : -   |

|            | 580 | *                                          | 600   | * |     |
|------------|-----|--------------------------------------------|-------|---|-----|
| TEA019378. | :   | GFLAAGVLCAGFGLWAGLVYLSVLLNSSALS            | ----- | : | 412 |
| TEA009567. | :   | -----                                      | ----- | : | -   |
| TEA021168. | :   | TYSYAGTDWIGYDDMESISNKVNFARANGLGGYFFWAVGFD  | ----- | : | 486 |
| TEA018432. | :   | -----                                      | ----- | : | -   |
| TEA008468. | :   | -----                                      | ----- | : | -   |
| TEA024621. | :   | -----                                      | ----- | : | -   |
| TEA018426. | :   | -----                                      | ----- | : | -   |
| TEA030241. | :   | TMPFPIVAFTKCGLRPLDPLFRQVLHFYKLNPMQLTINSY   | ----- | : | 520 |
| TEA009345. | :   | -----                                      | ----- | : | 384 |
| TEA013798. | :   | -----                                      | ----- | : | 378 |
| TEA009364. | :   | SLPTLTVETCELHRVNAQLTLFQHMYKDARAEICALKADNK  | ----- | : | 420 |
| TEA013812. | :   | PTICVLIIFLLGTLLWYLQRGVLKKKGKKSESPNLQVFSFAD | ----- | : | 417 |
| TEA015728. | :   | -----                                      | ----- | : | -   |
| TEA015711. | :   | -----                                      | ----- | : | -   |
| TEA015702. | :   | -----                                      | ----- | : | -   |
| TEA012713. | :   | GQFVYFSPASTSSWVSNAISSITQIVTEYNLDGIDIDYEHY  | ----- | : | 441 |
| TEA025942. | :   | -----                                      | ----- | : | -   |
| TEA001202. | :   | -----                                      | ----- | : | -   |
| TEA004985. | :   | -----                                      | ----- | : | -   |

|            | 620 | *                                           | 640   | * |     |
|------------|-----|---------------------------------------------|-------|---|-----|
| TEA019378. | :   | -----                                       | ----- | : | -   |
| TEA009567. | :   | -----                                       | ----- | : | -   |
| TEA021168. | :   | KNWTISEAGSLHNI FQGW                         | ----- | : | 504 |
| TEA018432. | :   | -----                                       | ----- | : | -   |
| TEA008468. | :   | -----                                       | ----- | : | -   |
| TEA024621. | :   | -----                                       | ----- | : | -   |
| TEA018426. | :   | -----                                       | ----- | : | -   |
| TEA030241. | :   | RVINGIIVLARQENLRIT                          | ----- | : | 538 |
| TEA009345. | :   | -LINNVHT                                    | ----- | : | 391 |
| TEA013798. | :   | -IEENLETKEDRVAEA                            | ----- | : | 395 |
| TEA009364. | :   | ELKRRKATSMENKEVKRQATFMARFGAPSYFAFDGRRRVNLV  | ----- | : | 461 |
| TEA013812. | :   | IKVVTTNNFSSSENKLGQGGFGPVYKGKLPDGQEIAVKRLSET | ----- | : | 458 |
| TEA015728. | :   | -----                                       | ----- | : | -   |
| TEA015711. | :   | -----                                       | ----- | : | -   |
| TEA015702. | :   | -----                                       | ----- | : | -   |
| TEA012713. | :   | NADPDTFAECIGQLLSYLKENKIVSFTSIAPFEDDSVQPHY   | ----- | : | 482 |
| TEA025942. | :   | -----                                       | ----- | : | -   |
| TEA001202. | :   | -----                                       | ----- | : | -   |
| TEA004985. | :   | -----                                       | ----- | : | -   |

|            | 660 | *                                          | 680 | *     |     |
|------------|-----|--------------------------------------------|-----|-------|-----|
| TEA019378. | :   | -----                                      | :   | ----- | :   |
| TEA009567. | :   | -----                                      | :   | ----- | :   |
| TEA021168. | :   | -----                                      | :   | ----- | :   |
| TEA018432. | :   | -----                                      | :   | ----- | :   |
| TEA008468. | :   | -----                                      | :   | ----- | :   |
| TEA024621. | :   | -----                                      | :   | ----- | :   |
| TEA018426. | :   | -----                                      | :   | ----- | :   |
| TEA030241. | :   | -----LADLQYCYTMCPLDLK                      | :   | ----- | 554 |
| TEA009345. | :   | -----                                      | :   | ----- | -   |
| TEA013798. | :   | -----LEDDQHLKDFIDLKGL                      | :   | ----- | 411 |
| TEA009364. | :   | KTLRQGLRSDEVPPFDSIIDIAAALGADMEVKDAPDLLPLA  | :   | ----- | 502 |
| TEA013812. | :   | SRQGVVEEYKNEVSLTAKLQHVNLVRLLGFCTEREEKLLIYE | :   | ----- | 499 |
| TEA015728. | :   | -----                                      | :   | ----- | -   |
| TEA015711. | :   | -----                                      | :   | ----- | -   |
| TEA015702. | :   | -----                                      | :   | ----- | -   |
| TEA012713. | :   | LALWKKYGYLIDYVNFQFYTYDNGTTVQQFIQYFETQSSNY  | :   | ----- | 523 |
| TEA025942. | :   | -----                                      | :   | ----- | -   |
| TEA001202. | :   | -----                                      | :   | ----- | -   |
| TEA004985. | :   | -----                                      | :   | ----- | -   |

|            | 700 | *                                          | 720 | *     | 7   |
|------------|-----|--------------------------------------------|-----|-------|-----|
| TEA019378. | :   | -----                                      | :   | ----- | :   |
| TEA009567. | :   | -----                                      | :   | ----- | :   |
| TEA021168. | :   | -----                                      | :   | ----- | :   |
| TEA018432. | :   | -----                                      | :   | ----- | :   |
| TEA008468. | :   | -----                                      | :   | ----- | :   |
| TEA024621. | :   | -----                                      | :   | ----- | :   |
| TEA018426. | :   | -----                                      | :   | ----- | :   |
| TEA030241. | :   | DRSFVYYLKPRSTQYK---IIADLPDSNKGAEDDFLIASGN  | :   | ----- | 592 |
| TEA009345. | :   | -----                                      | :   | ----- | -   |
| TEA013798. | :   | E-----                                     | :   | ----- | 412 |
| TEA009364. | :   | DRPFDAVIYQPDTYILPPSEILRFMGFIPGLEDDTLLCEPT  | :   | ----- | 543 |
| TEA013812. | :   | YMPNKSLDFYLYDPDGRSLLDWEKWLHIIIEGVTQGLLYLQE | :   | ----- | 540 |
| TEA015728. | :   | -----                                      | :   | ----- | -   |
| TEA015711. | :   | -----                                      | :   | ----- | -   |
| TEA015702. | :   | -----                                      | :   | ----- | -   |
| TEA012713. | :   | EGGKILVSFGTDGSGGLKPEDGFFEACRMLRSQNKLHGIFI  | :   | ----- | 564 |
| TEA025942. | :   | -----                                      | :   | ----- | -   |
| TEA001202. | :   | -----                                      | :   | ----- | -   |
| TEA004985. | :   | -----                                      | :   | ----- | -   |

|            | 40 | *                                                 | 760 | *     | 78 |     |
|------------|----|---------------------------------------------------|-----|-------|----|-----|
| TEA019378. | :  | -----                                             | :   | ----- | :  | -   |
| TEA009567. | :  | -----                                             | :   | ----- | :  | -   |
| TEA021168. | :  | -----                                             | :   | ----- | :  | -   |
| TEA018432. | :  | -----                                             | :   | ----- | :  | -   |
| TEA008468. | :  | -----                                             | :   | ----- | :  | -   |
| TEA024621. | :  | -----                                             | :   | ----- | :  | -   |
| TEA018426. | :  | -----                                             | :   | ----- | :  | -   |
| TEA030241. | :  | WEFGPDEDVHLYP-----LPRTITEG                        | :   |       | :  | 613 |
| TEA009345. | :  | -----                                             | :   | ----- | :  | -   |
| TEA013798. | :  | -----                                             | :   | ----- | :  | -   |
| TEA009364. | :  | EHLSTEASTVVARRIIGYG<br>TILG<br>PQRWYERLPAEVRTVVDA | :   |       | :  | 584 |
| TEA013812. | :  | YSRFTIVHRDLKASNILL<br>DKDMKPKISDFGIARIFQK<br>DEHE | :   |       | :  | 581 |
| TEA015728. | :  | -----                                             | :   | ----- | :  | -   |
| TEA015711. | :  | -----                                             | :   | ----- | :  | -   |
| TEA015702. | :  | -----                                             | :   | ----- | :  | -   |
| TEA012713. | :  | WSADDSQEAVLLTRDNKGS<br>FEK-----                   | :   |       | :  | 586 |
| TEA025942. | :  | -----                                             | :   | ----- | :  | -   |
| TEA001202. | :  | -----                                             | :   | ----- | :  | -   |
| TEA004985. | :  | -----                                             | :   | ----- | :  | -   |

|            | 0 | *                                                 | 800 | *     | 820 |     |
|------------|---|---------------------------------------------------|-----|-------|-----|-----|
| TEA019378. | : | -----                                             | :   | ----- | :   | -   |
| TEA009567. | : | -----                                             | :   | ----- | :   | -   |
| TEA021168. | : | -----                                             | :   | ----- | :   | -   |
| TEA018432. | : | -----                                             | :   | ----- | :   | -   |
| TEA008468. | : | -----                                             | :   | ----- | :   | -   |
| TEA024621. | : | -----                                             | :   | ----- | :   | -   |
| TEA018426. | : | -----                                             | :   | ----- | :   | -   |
| TEA030241. | : | KSKSPESSTTEKFSSILL<br>LGMLELTTI-----              | :   |       | :   | 641 |
| TEA009345. | : | -----                                             | :   | ----- | :   | -   |
| TEA013798. | : | -----                                             | :   | ----- | :   | -   |
| TEA009364. | : | ADFGLFCSGLIQMRTE<br>SVLYGALAESFVSHCKVD<br>LLGGYWK | :   |       | :   | 625 |
| TEA013812. | : | ANTSHIVGTYGCVPEYV<br>KRGTYSTKYDVYSFGV<br>LLLQIIS  | :   |       | :   | 622 |
| TEA015728. | : | -----                                             | :   | ----- | :   | -   |
| TEA015711. | : | -----                                             | :   | ----- | :   | -   |
| TEA015702. | : | -----                                             | :   | ----- | :   | -   |
| TEA012713. | : | -----                                             | :   | ----- | :   | -   |
| TEA025942. | : | -----                                             | :   | ----- | :   | -   |
| TEA001202. | : | -----                                             | :   | ----- | :   | -   |
| TEA004985. | : | -----                                             | :   | ----- | :   | -   |

|            | * | 840                                       | * | 860 |     |
|------------|---|-------------------------------------------|---|-----|-----|
| TEA019378. | : | -----                                     | : |     | -   |
| TEA009567. | : | -----                                     | : |     | -   |
| TEA021168. | : | -----                                     | : |     | -   |
| TEA018432. | : | -----                                     | : |     | -   |
| TEA008468. | : | -----                                     | : |     | -   |
| TEA024621. | : | -----                                     | : |     | -   |
| TEA018426. | : | -----                                     | : |     | -   |
| TEA030241. | : | -----GLFHNKPNKLGEHEAYSQRCMYS-----         | : |     | 665 |
| TEA009345. | : | -----                                     | : |     | -   |
| TEA013798. | : | -----                                     | : |     | -   |
| TEA009364. | : | VWEVDWHPWAGIFAVSRATYAAAWYASTMRILFEGLFGRAY | : |     | 666 |
| TEA013812. | : | GKKNTSLHGLHKNLNILEYAYKLWKDGKGMDFMDPLLDDSS | : |     | 663 |
| TEA015728. | : | -----                                     | : |     | -   |
| TEA015711. | : | -----                                     | : |     | -   |
| TEA015702. | : | -----                                     | : |     | -   |
| TEA012713. | : | -----                                     | : |     | -   |
| TEA025942. | : | -----                                     | : |     | -   |
| TEA001202. | : | -----                                     | : |     | -   |
| TEA004985. | : | -----                                     | : |     | -   |

|            | * | 880                                         | * | 900 |     |
|------------|---|---------------------------------------------|---|-----|-----|
| TEA019378. | : | -----                                       | : |     | -   |
| TEA009567. | : | -----                                       | : |     | -   |
| TEA021168. | : | -----                                       | : |     | -   |
| TEA018432. | : | -----                                       | : |     | -   |
| TEA008468. | : | -----                                       | : |     | -   |
| TEA024621. | : | -----                                       | : |     | -   |
| TEA018426. | : | -----                                       | : |     | -   |
| TEA030241. | : | -----HQD-----                               | : |     | 668 |
| TEA009345. | : | -----                                       | : |     | -   |
| TEA013798. | : | -----                                       | : |     | -   |
| TEA009364. | : | YLGFRFIRQTRGVAHPDVPHSPPPGMRSVD AIQDGP MIDLL | : |     | 707 |
| TEA013812. | : | SSCKLMRCMQVALLCVQEKWQERPSM LEVSSMLKNETEVVP  | : |     | 704 |
| TEA015728. | : | -----                                       | : |     | -   |
| TEA015711. | : | -----                                       | : |     | -   |
| TEA015702. | : | -----                                       | : |     | -   |
| TEA012713. | : | -----                                       | : |     | -   |
| TEA025942. | : | -----                                       | : |     | -   |
| TEA001202. | : | -----                                       | : |     | -   |
| TEA004985. | : | -----                                       | : |     | -   |



|            | * | 920                                       | * | 940   |   |     |
|------------|---|-------------------------------------------|---|-------|---|-----|
| TEA019378. | : | -----                                     | : | ----- | : | -   |
| TEA009567. | : | -----                                     | : | ----- | : | -   |
| TEA021168. | : | -----                                     | : | ----- | : | -   |
| TEA018432. | : | -----                                     | : | ----- | : | -   |
| TEA008468. | : | -----                                     | : | ----- | : | -   |
| TEA024621. | : | -----                                     | : | ----- | : | -   |
| TEA018426. | : | -----                                     | : | ----- | : | -   |
| TEA030241. | : | -----                                     | : | ----- | : | -   |
| TEA009345. | : | -----                                     | : | ----- | : | -   |
| TEA013798. | : | -----                                     | : | ----- | : | -   |
| TEA009364. | : | MEGEDGDRYYMAGDFTTFLHTRVMAPLTLGVAHAIPKVAAT | : |       | : | 748 |
| TEA013812. | : | IPQRPAFSTNKDKEEENLTLRQQTCSVDDATI SEVVPR-- | : |       | : | 743 |
| TEA015728. | : | -----                                     | : | ----- | : | -   |
| TEA015711. | : | -----                                     | : | ----- | : | -   |
| TEA015702. | : | -----                                     | : | ----- | : | -   |
| TEA012713. | : | -----                                     | : | ----- | : | -   |
| TEA025942. | : | -----                                     | : | ----- | : | -   |
| TEA001202. | : | -----                                     | : | ----- | : | -   |
| TEA004985. | : | -----                                     | : | ----- | : | -   |

|            | * | 960                                         | * | 980   |   |     |
|------------|---|---------------------------------------------|---|-------|---|-----|
| TEA019378. | : | -----                                       | : | ----- | : | -   |
| TEA009567. | : | -----                                       | : | ----- | : | -   |
| TEA021168. | : | -----                                       | : | ----- | : | -   |
| TEA018432. | : | -----                                       | : | ----- | : | -   |
| TEA008468. | : | -----                                       | : | ----- | : | -   |
| TEA024621. | : | -----                                       | : | ----- | : | -   |
| TEA018426. | : | -----                                       | : | ----- | : | -   |
| TEA030241. | : | -----                                       | : | ----- | : | -   |
| TEA009345. | : | -----                                       | : | ----- | : | -   |
| TEA013798. | : | -----                                       | : | ----- | : | -   |
| TEA009364. | : | VAGAGDAPARGAPAVAPI PGFPMI PTEITYMRPNGVLEQIP | : |       | : | 789 |
| TEA013812. | : | -----                                       | : | ----- | : | -   |
| TEA015728. | : | -----                                       | : | ----- | : | -   |
| TEA015711. | : | -----                                       | : | ----- | : | -   |
| TEA015702. | : | -----                                       | : | ----- | : | -   |
| TEA012713. | : | -----                                       | : | ----- | : | -   |
| TEA025942. | : | -----                                       | : | ----- | : | -   |
| TEA001202. | : | -----                                       | : | ----- | : | -   |
| TEA004985. | : | -----                                       | : | ----- | : | -   |

```

          *          1000          *          1020
TEA019378. : ----- : -
TEA009567. : ----- : -
TEA021168. : ----- : -
TEA018432. : ----- : -
TEA008468. : ----- : -
TEA024621. : ----- : -
TEA018426. : ----- : -
TEA030241. : ----- : -
TEA009345. : ----- : -
TEA013798. : ----- : -
TEA009364. : IDEIEEKDCRIVFAPGIEQVHISLWFPPFIAYDLARTIDRLL : 830
TEA013812. : ----- : -
TEA015728. : ----- : -
TEA015711. : ----- : -
TEA015702. : ----- : -
TEA012713. : ----- : -
TEA025942. : ----- : -
TEA001202. : ----- : -
TEA004985. : ----- : -

```

```

          *          1040          *
TEA019378. : ----- : -
TEA009567. : ----- : -
TEA021168. : ----- : -
TEA018432. : ----- : -
TEA008468. : ----- : -
TEA024621. : ----- : -
TEA018426. : ----- : -
TEA030241. : ----- : -
TEA009345. : ----- : -
TEA013798. : ----- : -
TEA009364. : LMVRRSQTTLAAHGLELGPAPVAPIRPPPARR : 862
TEA013812. : ----- : -
TEA015728. : ----- : -
TEA015711. : ----- : -
TEA015702. : ----- : -
TEA012713. : ----- : -
TEA025942. : ----- : -
TEA001202. : ----- : -
TEA004985. : ----- : -

```
